# Supplementary material for: FGF and canonical Wnt signaling cooperate to induce paraxial mesoderm from tailbud neuromesodermal progenitors through regulation of a two-step epithelial to mesenchymal transition
Source: Oxford University Press journal article supplement (doi:10.1242/dev.143578), 2017-02-28
Supplement: dev143578supp.pdf [file dev143578supp.pdf]

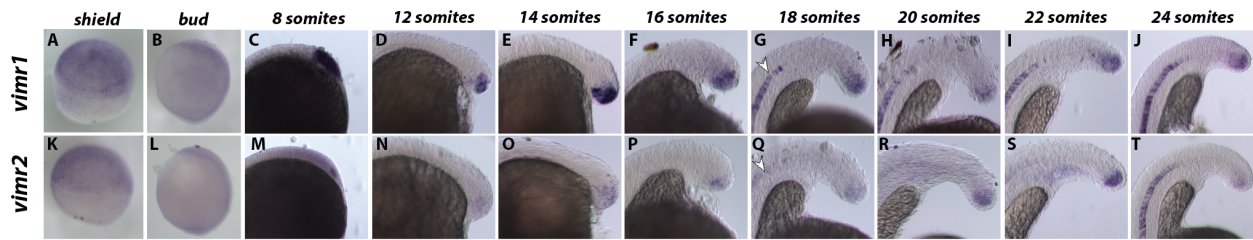

Goto et al. Supplemental Figure 1

### Supplemental Figure 1. Time course expression of vimentin related genes

*Vimr1* (A-J) and *Vimr2* (K-T) expression in wildtype embryos fixed at different stages. The beginning of notochord expression at the 18-somite stage is indicated by arrowheads (G and Q). Shield staged embryos were taken laterally with the shield towards the right. Embryos from 8-somite stage and onward were taken laterally with anterior towards the bottom.

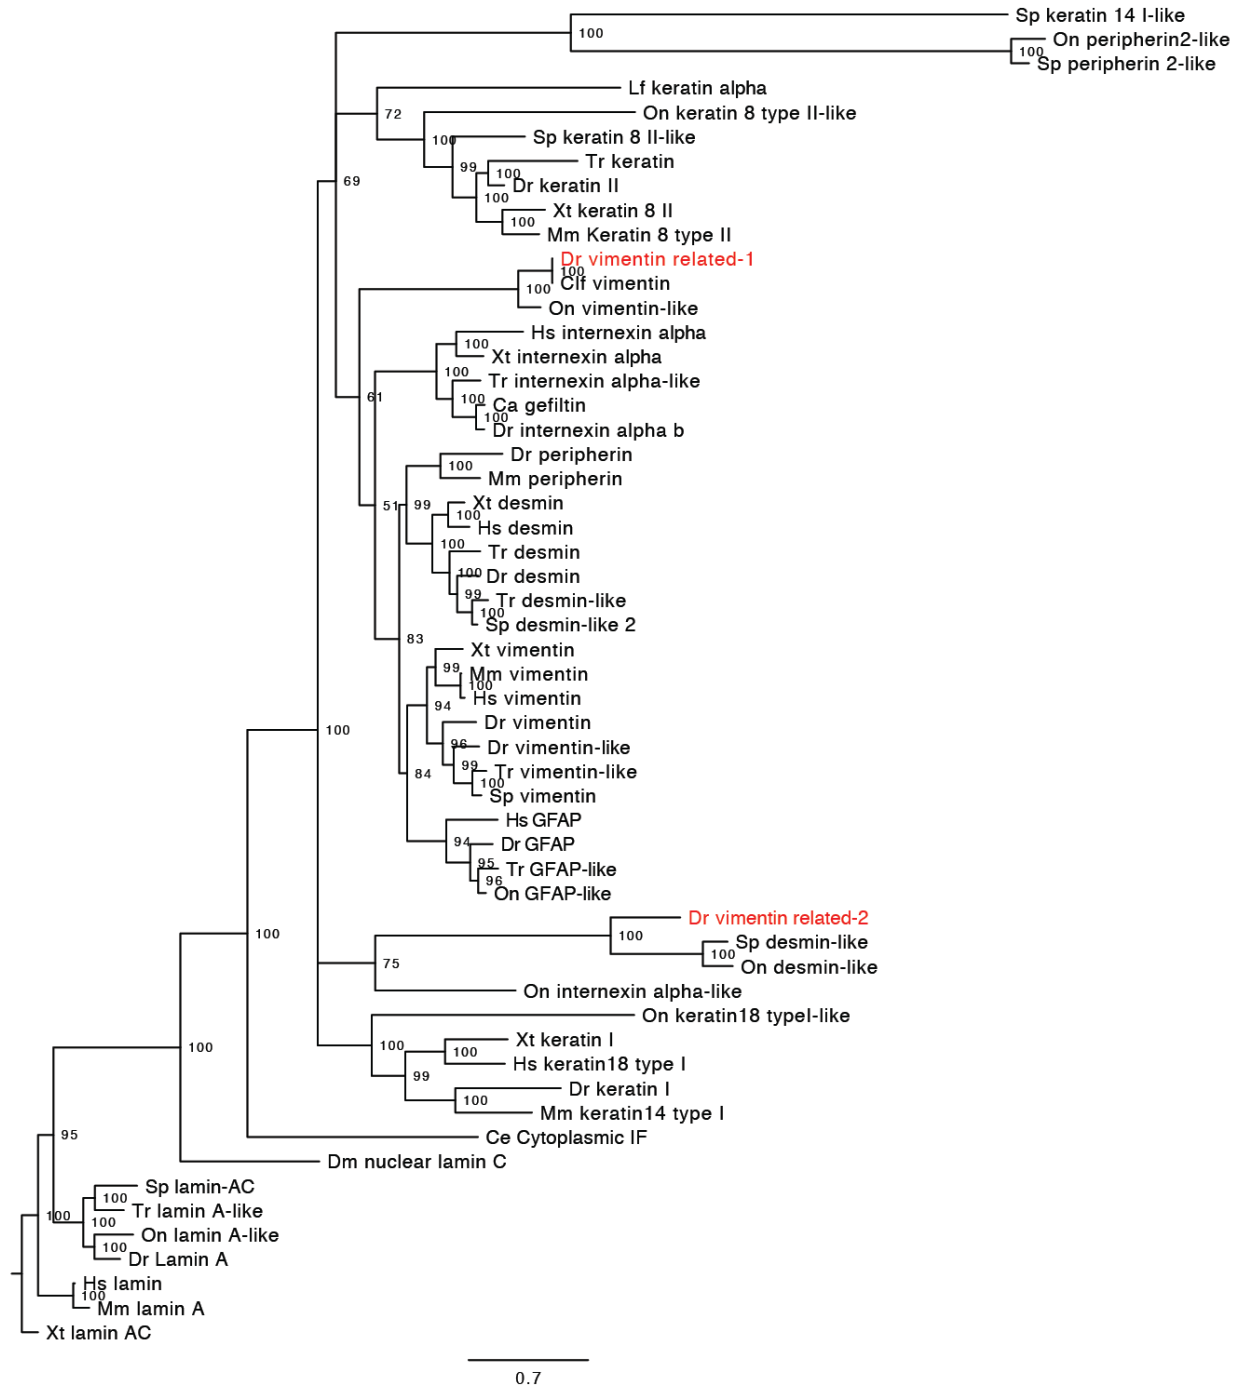

Goto et al. Supplemental Figure 2

## Supplemental Figure 2. Phylogenetic analysis of intermediate filaments

Bayesian phylogenetic analysis of zebrafish vimentin-like genes with other intermediate filaments with laminin genes serving as an outgroup. The numbers at the node specify Bayesian posterior probabilities. Species abbreviations with common names in parentheses: Ca, *Carassius auratus* (goldfish); Ce, *Caenorhabditis elegans* (nematode); Clf, *Canis lupus familiaris* (Dog); Dm, *Drosophila melanogaster* (fruit fly); Dr, *Danio rerio* (Zebrafish); Hs, *Homo sapiens* (human); Lf, *Lampetra fluviatilis* (Lamprey); Mm, *Mus musculus* (mouse); On, *Oreochromis niloticus* (Nile tilapia); Sp, *Stegastes partitus* (bicolor damselfish); Tr, *Takifugu rubripes* (pufferfish); Xt, *Xenopus tropicalis* (frog)

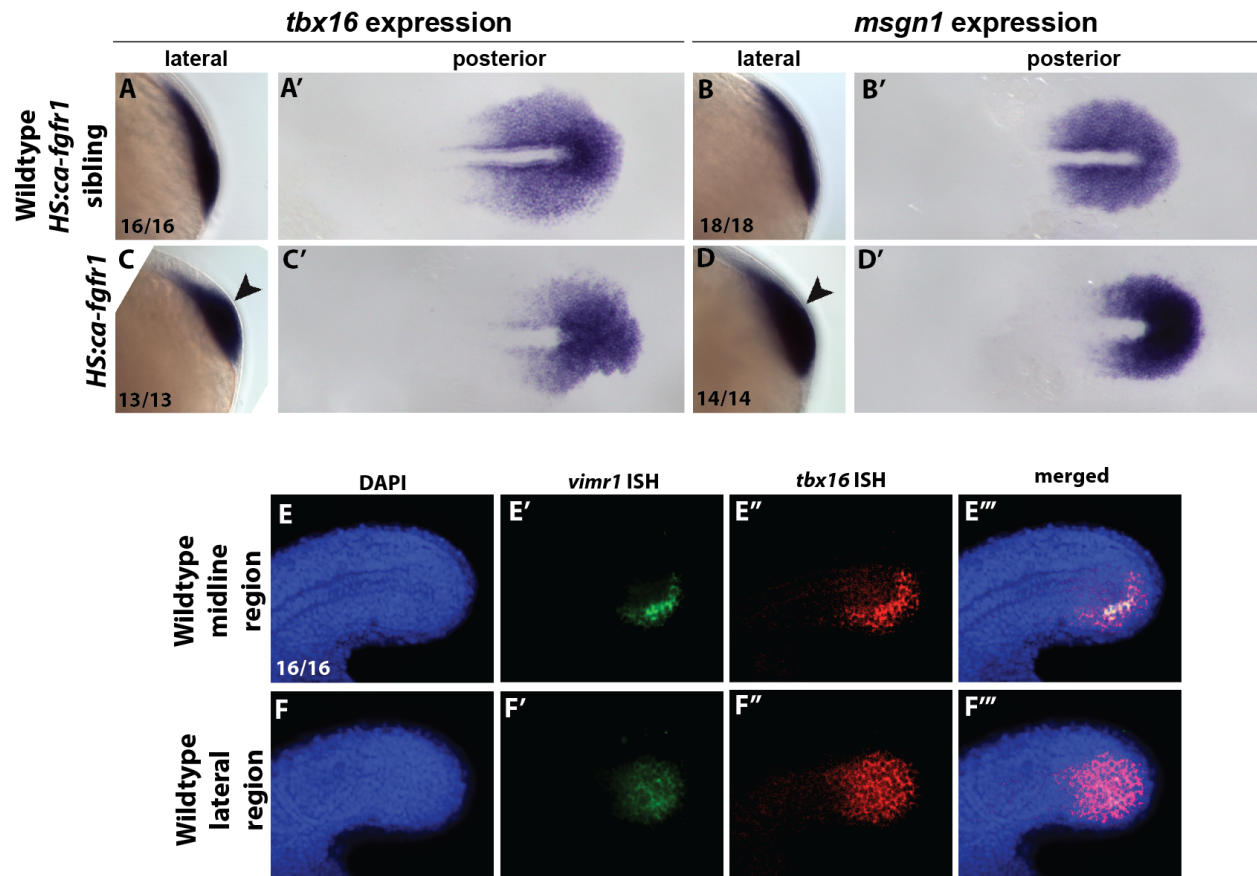

Goto et al. Supplemental Figure 3

**Supplemental Figure 3. Expression of mesodermal maturation genes in FGF overactivated tailbud and expression domains of *vimr1* and *tbx16* in the wildtype tailbud.** HS:*cafgfr1* and wildtype embryos were heat-shocked at bud stage and fixed at 8-somite stage to examine the effect of FGF overactivation on maturation gene expression. Overactivation of FGF leads to strong expression of *tbx16* and *msgn1*, which expands into the NMP region (C, C', D, D') compared to the control (A, A', B, B'). Double fluorescent *in situ* hybridization of *tbx16* and *vimr1* in a wild-type 20-somite stage embryo. As the mesodermal progenitors move from the dorsal region to ventral region, the cells turn on *vimr1* and *tbx16* (E, E', E'', E'''). However, as the cells enter the maturation zone in the lateral regions, the cells turn off *vimr1* (F, F', F'', F''').

**Table S1. Statistics for time lapse tracking.** P values were calculated by Student's t-test. S indicates significant ( $p < 0.05$ ), while NS implies nonsignificant ( $p > 0.05$ ).

| Embryo          | number of embryos | Total tracks | Displacement                    |                                  | Mean Track Speed                |                                  | Track straightness              |                                  |
|-----------------|-------------------|--------------|---------------------------------|----------------------------------|---------------------------------|----------------------------------|---------------------------------|----------------------------------|
|                 |                   |              | P val compared to wildtype-DMSO | P val compared to HStbx16-SU5402 | P val compared to wildtype-DMSO | P val compared to HStbx16-SU5402 | P val compared to wildtype-DMSO | P val compared to HStbx16-SU5402 |
| wildtype-DMSO   | 4                 | 268          |                                 |                                  |                                 |                                  |                                 |                                  |
| HS:tbx16-DMSO   | 3                 | 177          | p=0.7425; NS                    | p=0.433; NS                      | p=0.0323; S                     | p=0.2539; NS                     | p=0.1601; NS                    | p=0.9717; NS                     |
| wildtype-SU5402 | 3                 | 143          | p=0.0323; S                     | p=0.0073; S                      | p=0.0073; S                     | p=0.0151; S                      | p=0.1886; NS                    | p=0.1116; NS                     |
| HS:tbx16-SU5402 | 3                 | 223          |                                 |                                  |                                 |                                  |                                 |                                  |
| HS:caFGFr1-DMSO | 3                 | 169          | p=0.5225; NS                    |                                  | p=0.0065; S                     |                                  | p=0.3332; NS                    |                                  |

**Table S2. Raw data of transplanted lineage analysis and statistics.** P values were calculated by Fisher's exact test. S indicates significant ( $p < 0.05$ ), while NS denotes nonsignificant ( $p > 0.05$ ).

| Embryo            | number of embryos | Total muscle cells | Total nonmuscle cells | % muscle | % nonmuscle | P val compared to wildtype | P val compared to dnfgf |
|-------------------|-------------------|--------------------|-----------------------|----------|-------------|----------------------------|-------------------------|
| wildtype          | 10                | 167                | 68                    | 71.064   | 28.936      |                            |                         |
| HS:dnfgfr1        | 10                | 33                 | 127                   | 20.625   | 79.375      | $p < 0.0001$ ; S           |                         |
| pmsgn1/wildtype   | 9                 | 234                | 88                    | 72.671   | 27.329      | $p = 0.7028$ ; NS          |                         |
| pmsgn1/HS:dnfgfr1 | 10                | 216                | 191                   | 53.071   | 46.929      | $p < 0.0001$ ; S           | $p < 0.0001$ ; S        |
| ptbx16/wildtype   | 8                 | 177                | 96                    | 64.835   | 35.165      | $p = 0.153$ ; NS           |                         |
| ptbx16/HS:dnfgfr1 | 9                 | 97                 | 81                    | 54.494   | 45.506      | $p = 0.0006$ ; S           | $p < 0.0001$ ; S        |

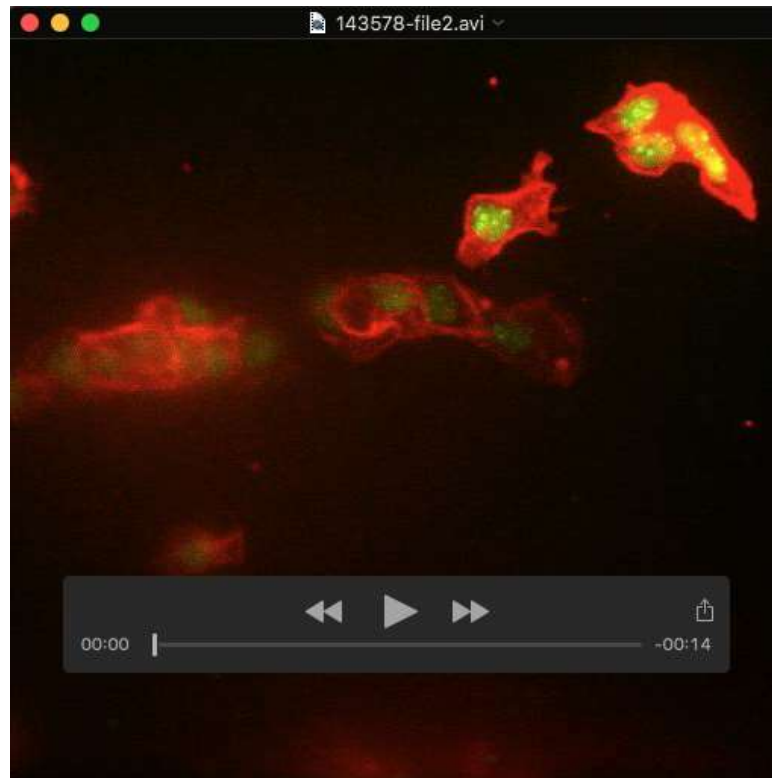

**Movie 1.** Time lapse movie of transplanted *HS:(CAAX)mCherry-p2a-(NLS)kikume* during the 1<sup>st</sup> EMT step. Cells of interest are in the upper right of the movie. Images were acquired every 5 minutes for 8 hours.

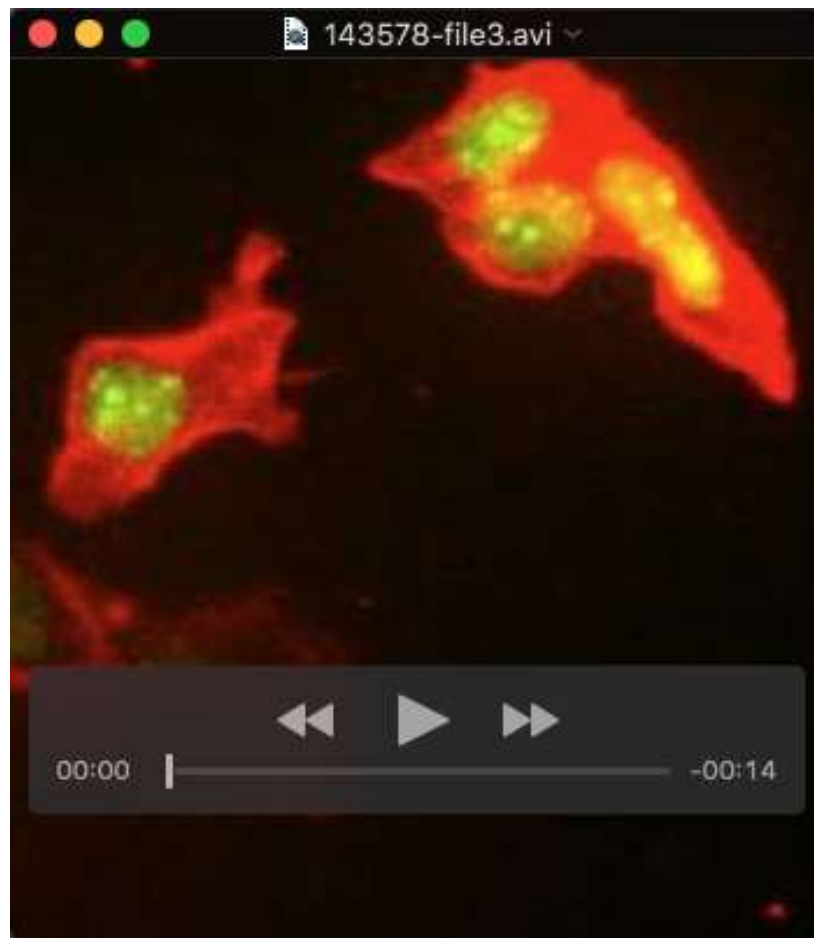

**Movie 2.** Cropped version of movie 1, focusing on cells of interest.



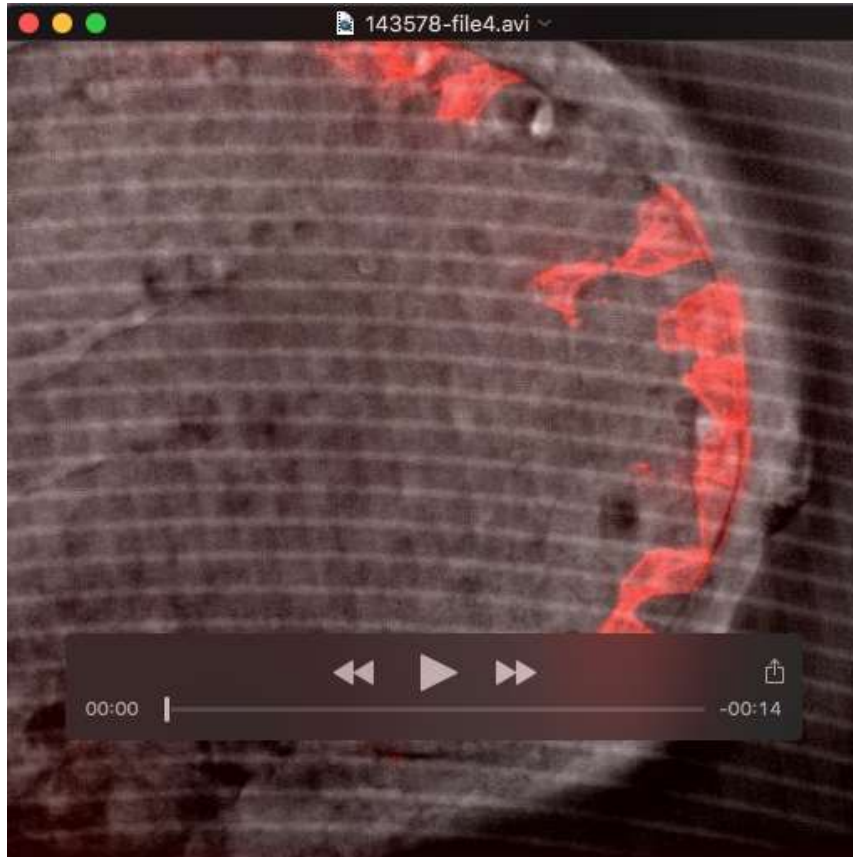

**Movie 3.** Time lapse movie of transplanted *HS:TCF $\Delta$ C* cells. . Images were acquired every 5 minutes for 8 hours.

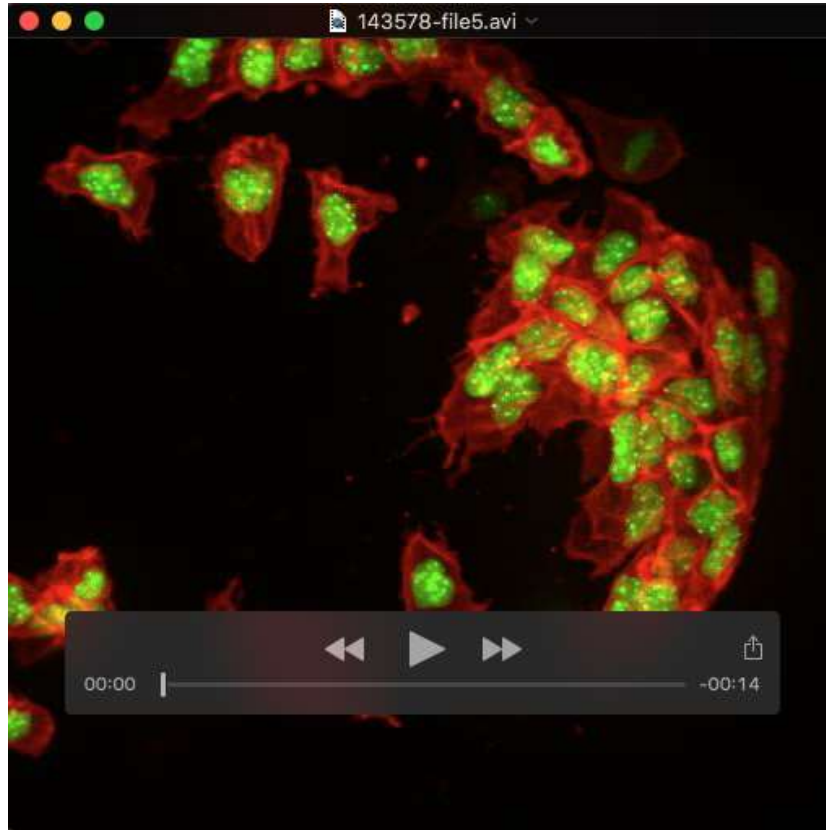

**Movie 4.** Time lapse movie of transplanted *HS:(CAAX)mCherry-p2a-(NLS)kikume* during the 2<sup>nd</sup> EMT step. The cell of interest is in the lower left of the movie. . Images were acquired every 5 minutes for 8 hours.

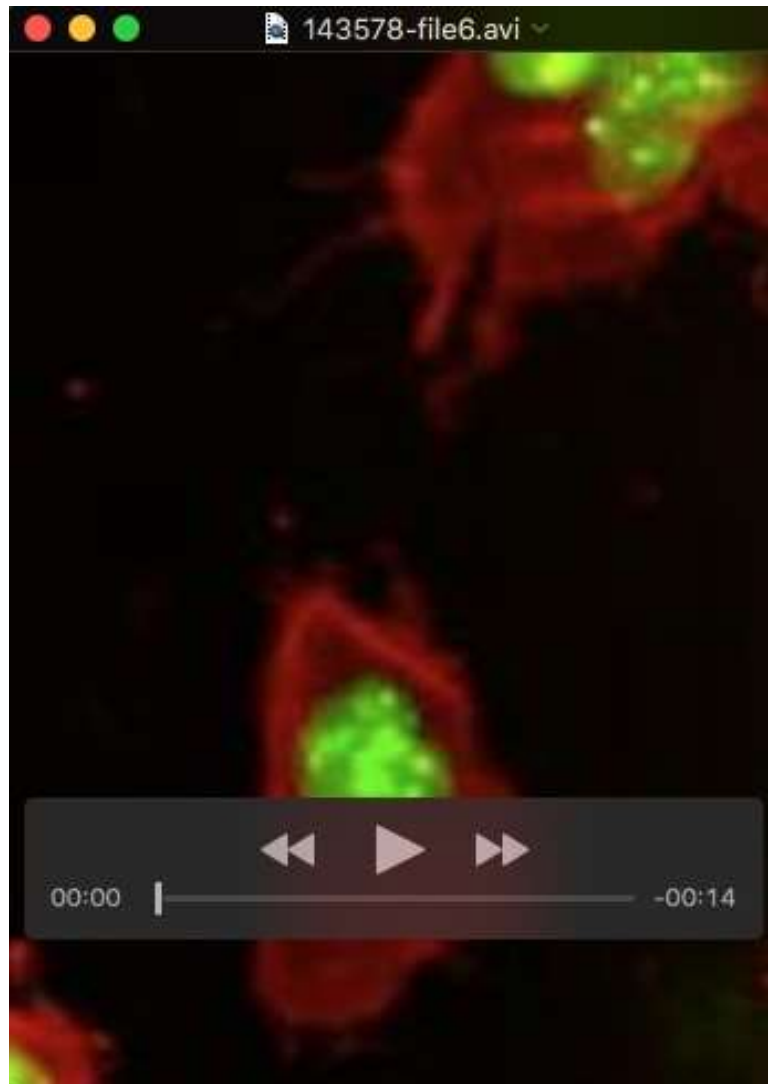

**Movie 5. Cropped version of movie 4, focusing on the cell of interest.**

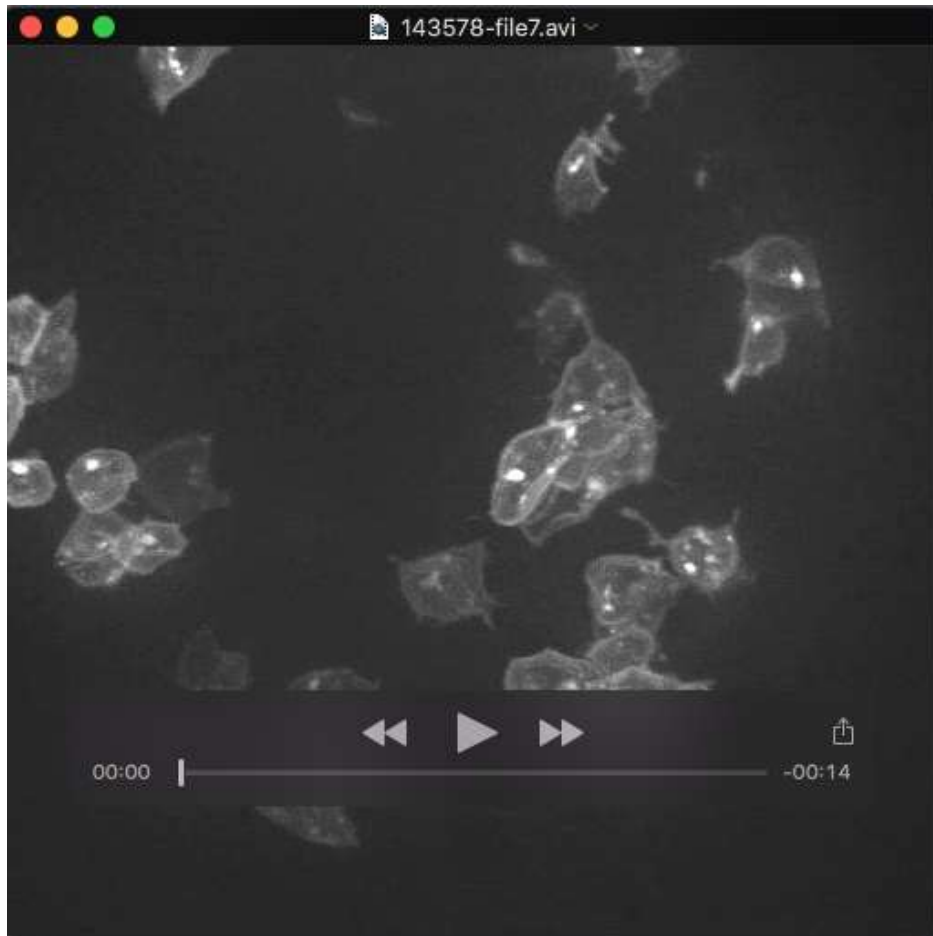

**Movie 6. Time lapse movie of transplanted *HS:dnfgfr1* cells.** The cell of interest is in the lower left of the movie. . Images were acquired every 5 minutes for 8 hours.

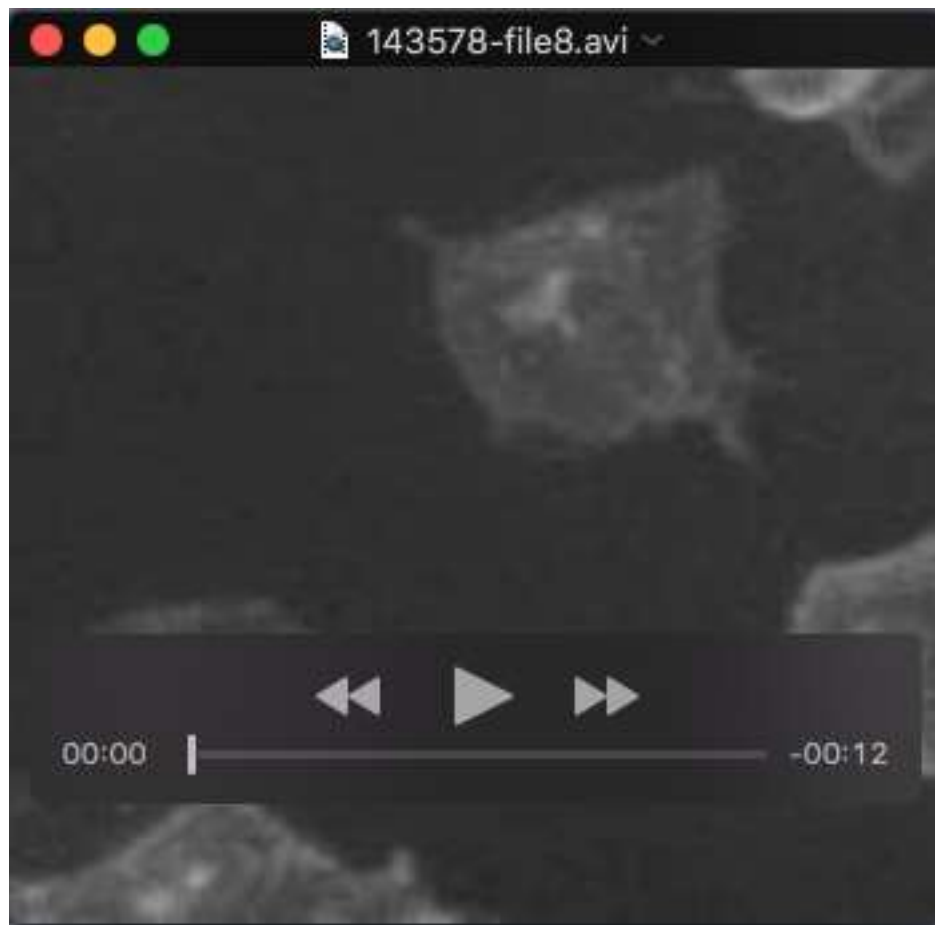

**Movie 7. Cropped version of movie 6, focusing on the cell of interest.**

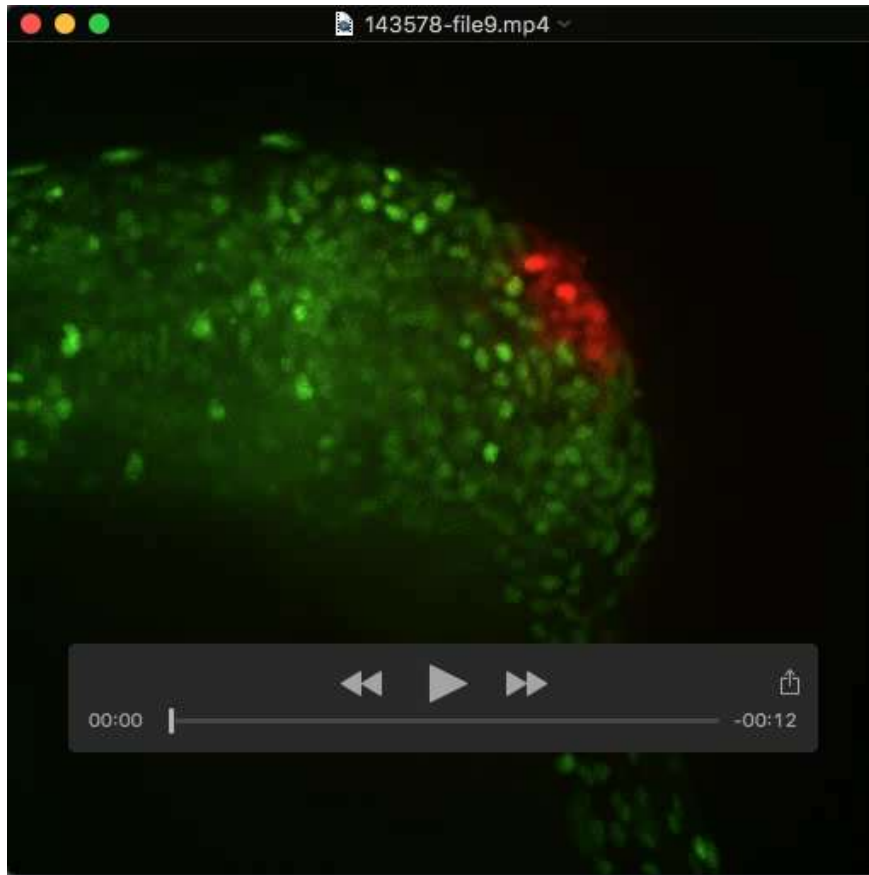

**Movie 8. Time lapse movie of photoconverted cells in a wildtype tailbud (merged)** A movie of wildtype photoconverted red tailbud cell with Z projection from 5 $\mu$ m Z-stacks merged with a projection of nonconverted cells in green. The embryo was treated with DMSO (vehicle). Images were acquired every 5 minutes for 5 hours. (5 frames per second).

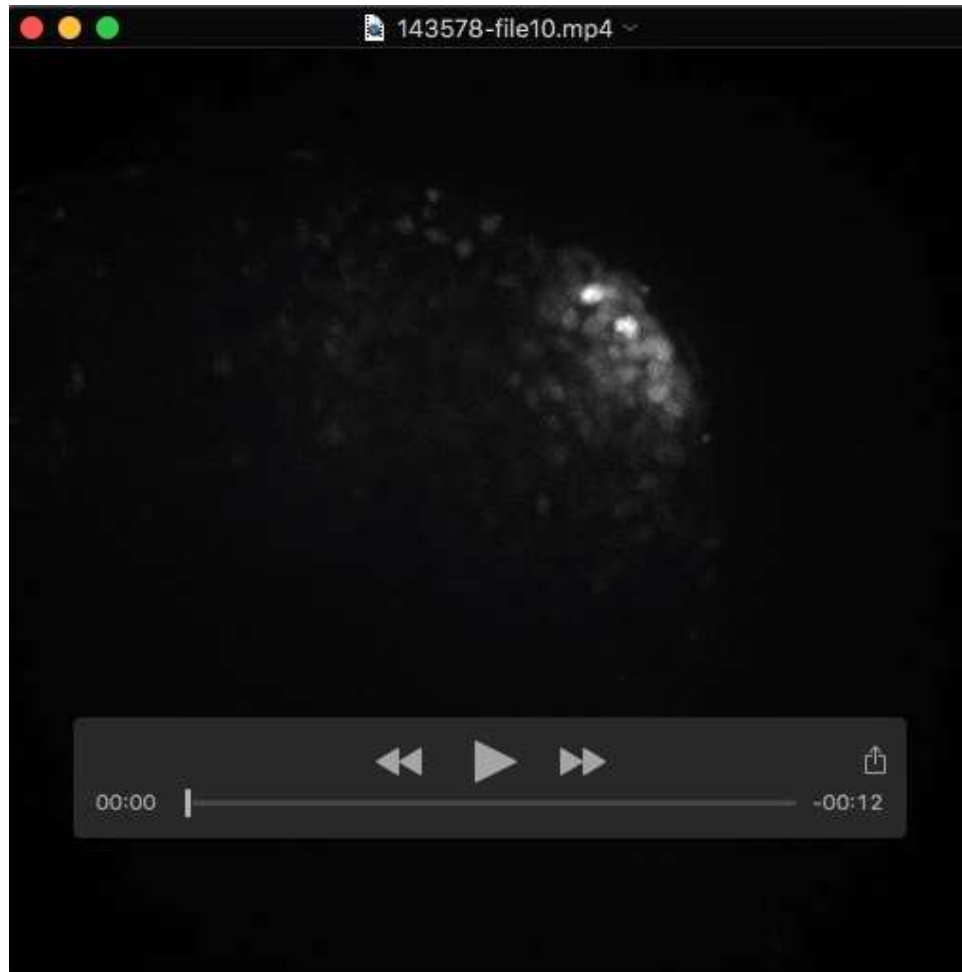

**Movie 9. Time lapse movie of photoconverted cells in a wildtype tailbud (photoconverted cells only)** A movie of wildtype photoconverted tailbud cell with Z projection from 5 $\mu$ m Z-stacks. The embryo was treated with DMSO (vehicle). Images were acquired every 5 minutes for 5 hours. (5 frames per second).

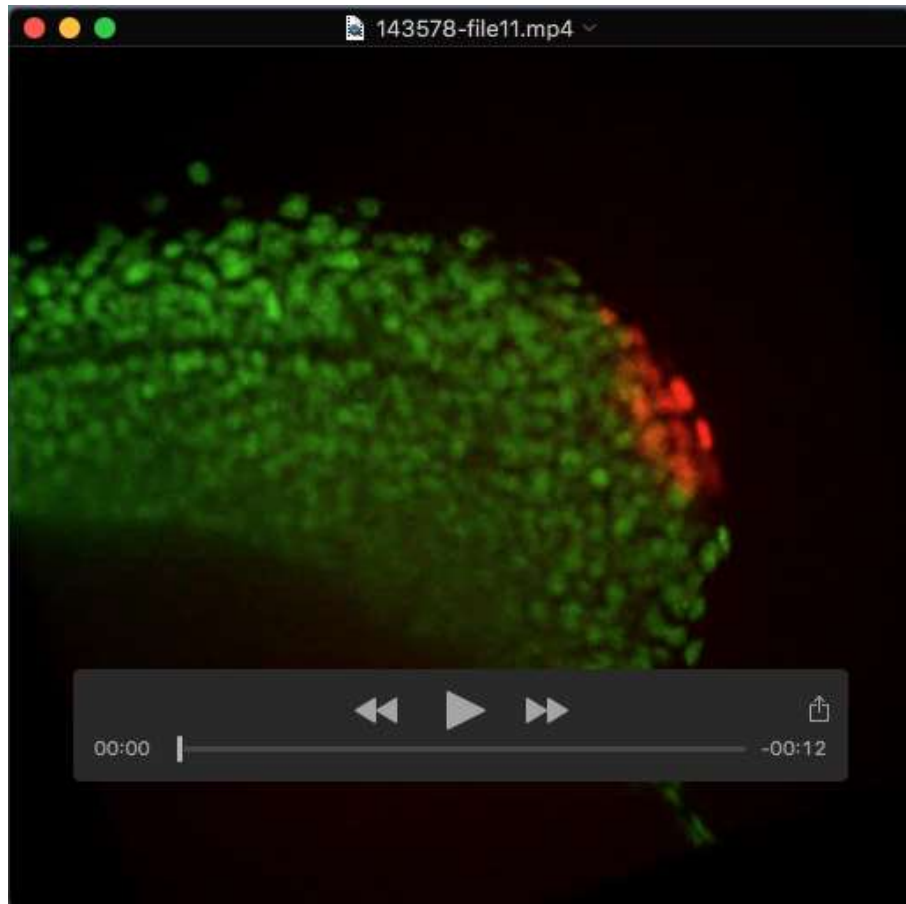

**Movie 10. Time lapse movie of photoconverted *tbx16* overexpressed progenitors in the tailbud (merged)** A movie of HS:*tbx16* photoconverted tailbud cells with Z projection from 5 $\mu$ m Z-stacks merged with unconverted green field projected plane. The embryo was treated with DMSO (vehicle). Images were acquired every 5 minutes for 5 hours. (5 frames per second).



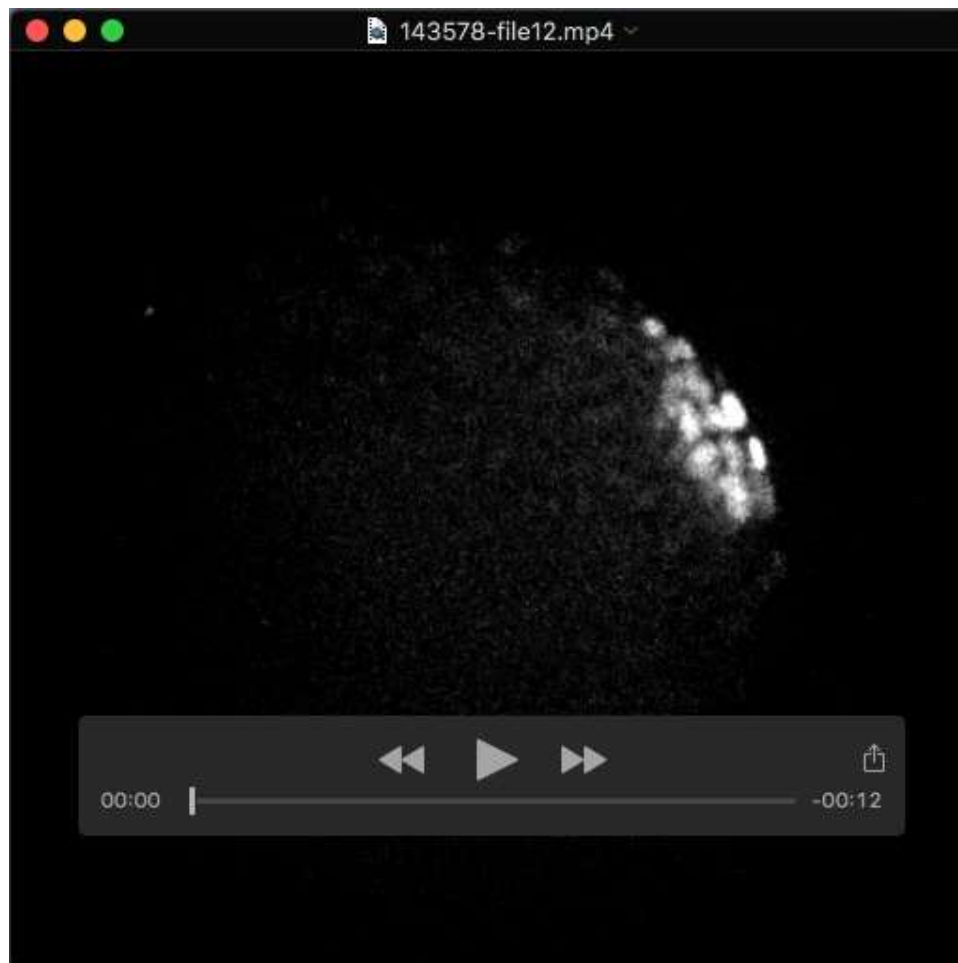

**Movie 11. Time lapse movie of photoconverted *tbx16* overexpressed progenitors in the tailbud (photoconverted cells only)** A movie of DMSO treated HS:*tbx16* photoconverted tailbud cells with Z projection from 5 $\mu$ m Z-stacks. Images were acquired every 5 minutes for 5 hours. (5 frames per second).

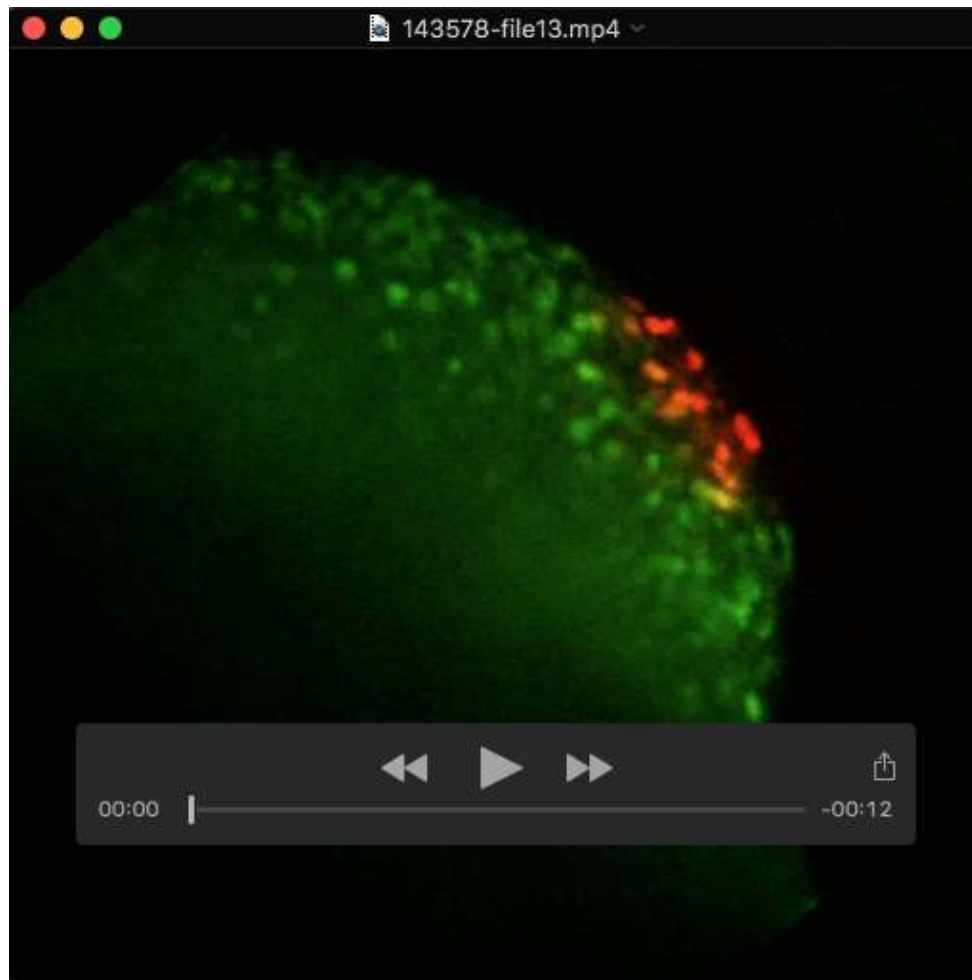

**Movie 12. Time lapse of photoconverted FGF inhibited progenitors in the tailbud (merged)**

Time lapse movie of SU5402 treated photoconverted tailbud cells with Z projection from 5um Z-stacks merged with a projection of nonconverted cells in green. Images were acquired every 5 minutes for 5 hours. (5 frames per second).

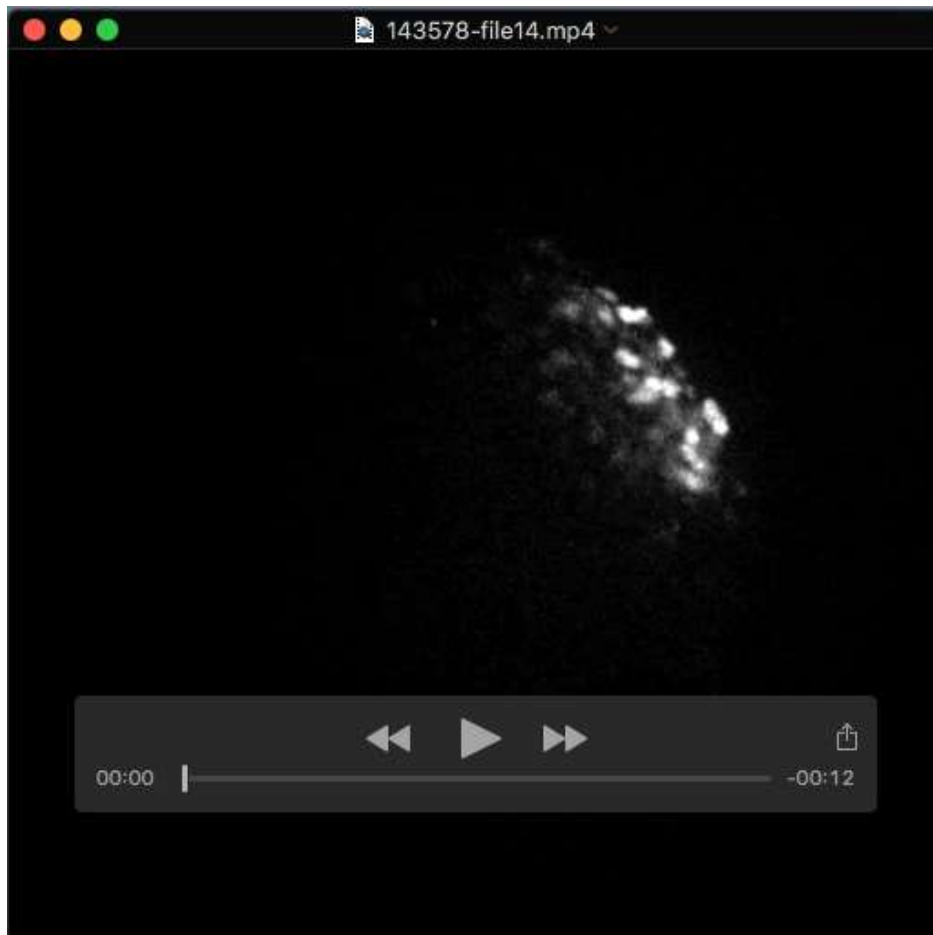

**Movie 13. Time lapse of photoconverted FGF inhibited progenitors in the tailbud (photoconverted cells only)** Time lapse movie of SU5402 treated photoconverted tailbud cells with Z projection from 5 $\mu$ m Z-stacks. Images were acquired every 5 minutes for 5 hours. (5 frames per second).

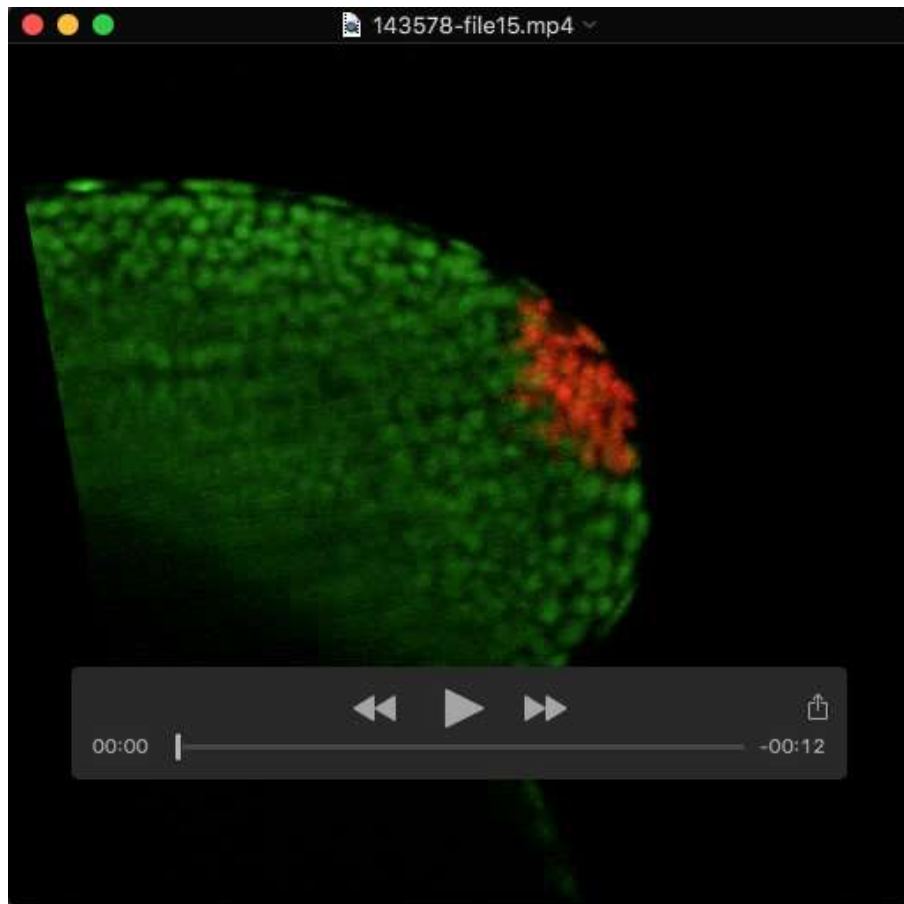

**Movie 14. Time lapse of photoconverted *tbx16* overexpressing progenitors in the SU5402 treated tailbud (merged)** Time lapse movie of SU5402 treated photoconverted *HS:tbx16* tailbud cells with Z projection from 5um Z-stacks merged with a projection of unconverted green field plane. Images were acquired every 5 minutes for 5 hours. (5 frames per second).

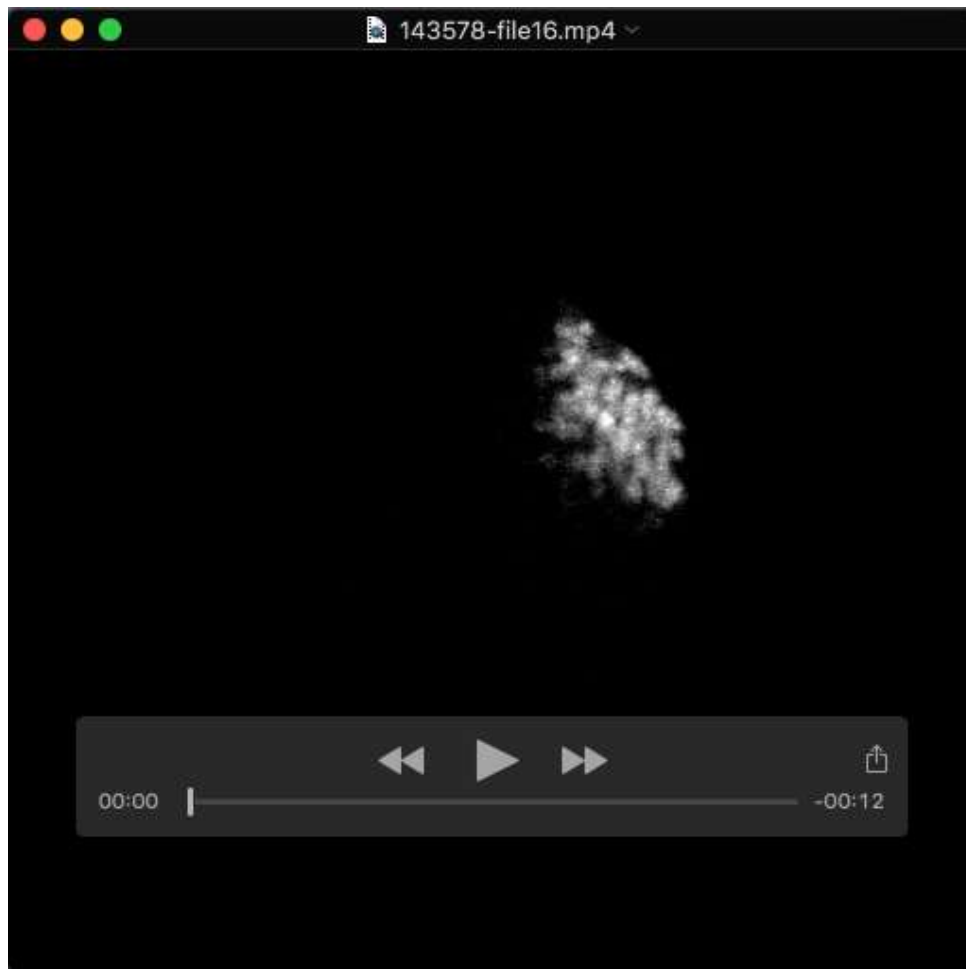

**Movie 15. Time lapse of photoconverted *tbx16* overexpressing progenitors in the SU5402 treated tailbud (photoconverted cells only)** Time lapse movie of SU5402 treated photoconverted nuclei of *HS:tbx16* tailbud cells with Z projection from 5um Z-stacks. Images were acquired every 5 minutes for 5 hours. (5 frames per second).

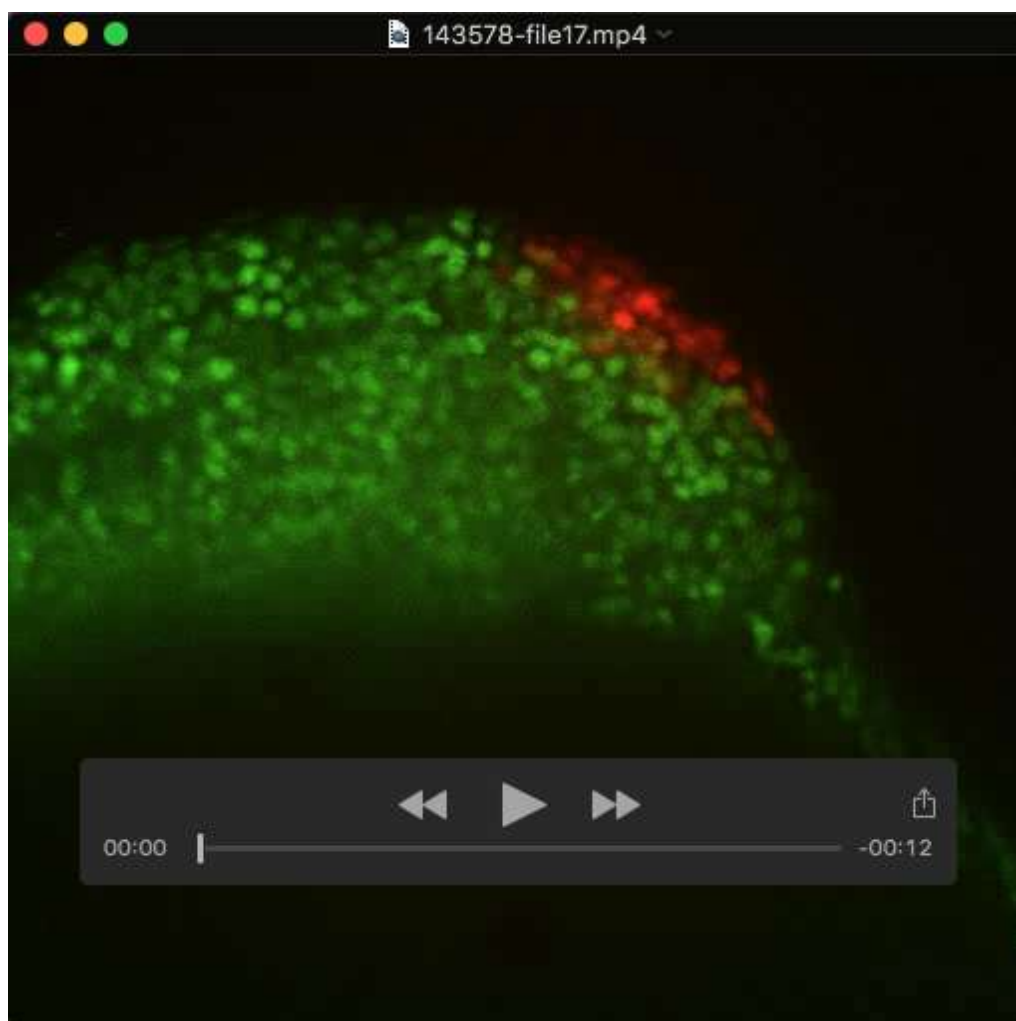

**Movie 16. Time lapse of photoconverted FGF overactivating progenitors in the tailbud**

**(merged)** Time lapse movie of DMSO treated photoconverted *HS:caFGFr1* tailbud cells with Z projection from 5 $\mu$ m Z-stacks merged with a projection of unconverted nuclei in green. Images were acquired every 5 minutes for 5 hours. (5 frames per second).

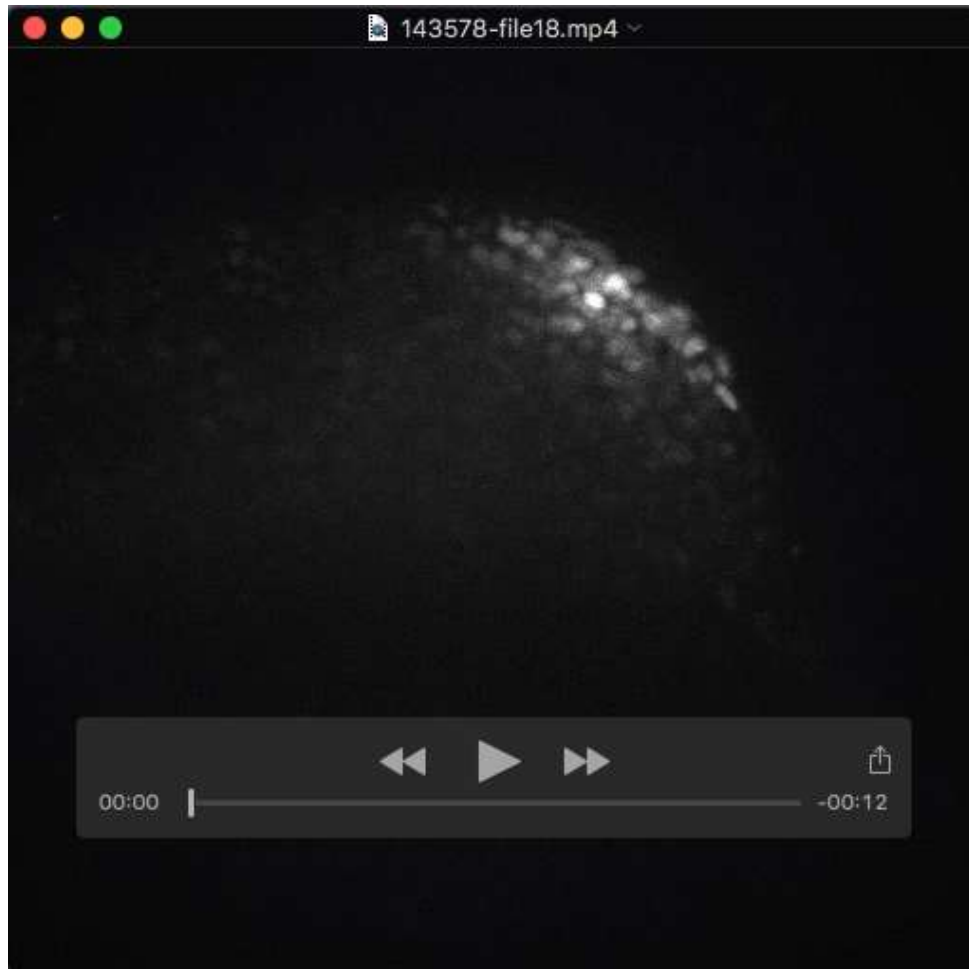

**Movie 17. Time lapse of photoconverted FGF overactivating progenitors in the tailbud**

**(photoconverted cells only)** Time lapse movie of DMSO treated photoconverted *HS:caFGFr1*

tailbud cells with Z projection from 5um Z-stacks. Images were acquired every 5 minutes for 5 hours. (5 frames per second).
